# Supplementary material
Source: publisher site journal article supplement (https://www.dovepress.com/article/supplementary_file/616559/616559%20_%20Revised%20Supplementary%20Table%201.docx)
Supplement: Supplementary file 1 [file 616559%20_%20Revised%20Supplementary%20Table%201.docx]

**Supplementary Table S1. Detailed JBI Critical Appraisal Results**

| **Randomized Controlled Trials (RCT)** | | | | | | | | | | | | | | | | | | | | | |
| --- | --- | --- | --- | --- | --- | --- | --- | --- | --- | --- | --- | --- | --- | --- | --- | --- | --- | --- | --- | --- | --- |
| **Study** | **Q1** | **Q2** | | **Q3** | | **Q4** | **Q5** | | **Q6** | | **Q7** | **Q8** | | **Q9** | | **Q10** | **Q11** | | **Q12** | | **Q13** |
| Tuncay et al., (2025)19 | Y | U | | Y | | N | N | | N | | Y | Y | | U | | Y | Y | | Y | | Y |
| Tandoğan et al., (2024)16 | Y | U | | N | | N | N | | Y | | Y | Y | | Y | | Y | Y | | Y | | Y |
| Turan & Yağmur, (2025)20 | Y | N | | Y | | N | N | | N | | Y | Y | | U | | Y | Y | | Y | | Y |
| **Quasi-Experimental Studies** | | | | | | | | | | | | | | | | | | | | | |
| **Study** | **Q1** | | **Q2** | | **Q3** | | | **Q4** | | **Q5** | | | **Q6** | | **Q7** | | | **Q8** | | **Q9** | |
| Ismiatun et al., (2024)23 | Y | | U | | U | | | Y | | N | | | Y | | Y | | | U | | Y | |
| Wanti et al., (2025)24 | Y | | Y | | Y | | | N | | N | | | Y | | Y | | | U | | Y | |
| Musliha et al., (2023)25 | Y | | Y | | Y | | | Y | | N | | | Y | | Y | | | U | | Y | |
| Nurpratiwi et al. (2024)26 | Y | | Y | | Y | | | N | | Y | | | Y | | Y | | | Y | | Y | |
| Agustin et al., (2023)27 | Y | | Y | | U | | | Y | | N | | | Y | | Y | | | Y | | Y | |
| Fajrin et al., (2023)17 | Y | | Y | | Y | | | N | | N | | | Y | | Y | | | Y | | Y | |
| Nurpratiwi et al. (2020)28 | Y | | Y | | Y | | | Y | | Y | | | Y | | Y | | | Y | | Y | |

**Notes**: Y = Yes; N = No; U = Unclear.
